# Supplementary material
Source: PubMed Central journal article supplement (PMC4857468)
Supplement: supp_jiw013_jiw013supp.pdf [file supp_jiw013_jiw013supp.pdf]

## Legends to Supplementary Figures

### Figure S1. Construction and analysis of *bb0405*-mutant *Borrelia burgdorferi*. (A)

Schematic of the wild-type (WT) and *bb0405*-mutant (Mut1) isolates at the *bb0405* locus. Genes *bb0403–bb0407* (white box arrows) and kanamycin-resistance cassette driven by the *B. burgdorferi flaB* promoter (*flaB-Kan*, gray box arrow) are indicated. Primers P1–4 (black arrowheads) were used to amplify 5' and 3' arms for homologous recombination and ligated on either side of the *flaB-Kan* cassette as detailed in the text. (B) Desired insertion of the mutagenic construct, *flaB-Kan*, in the *bb0405* genomic locus. Primers P5–10 (gray arrowheads, positions indicated in (A)) were used for DNA amplification in WT spirochetes or *bb0405* mutants and subjected to gel electrophoresis. The combination of primers used for PCR is indicated at the top, and migration of the DNA ladder is shown on the left. (C) RT-PCR analysis of WT and *bb0405* mutant. Total RNA was isolated from WT and *bb0405*-mutant *B. burgdorferi* and converted to cDNA, which was used to amplify regions within *bb0405* and *flaB* and visualized on a gel (upper panel). Polar effects of mutation are indicated in the lower panel. RT-PCR analysis of WT and *bb0405* mutants using primers specific for *bb0404* and *bb0406* indicated comparable levels of expression. (D) Protein analyses of WT and *bb0405* mutant. Equal amounts of protein were separated by SDS-PAGE and either stained with Coomassie Brilliant Blue (left) or transferred onto a nitrocellulose membrane and probed with BB0405 and FlaB antibodies (right). Migration of protein marker is shown in kilodaltons (kDa). (E) Growth curves for WT and *bb0405* mutants. Two mutant clones (Mut1 and Mut2) and wild-type spirochetes were diluted to  $10^5$  cells/ml and grown at 34°C in BSK-H media. Triplicate samples were counted under a darkfield microscope using a Petroff-Hausser cell counter.

**Figure S2. Comparable plasmid profiles of *bb0405* mutants.** PCR analyses of genomic DNA of *bb0405* mutants using plasmid-specific primers as detailed. DNA was isolated from *B. burgdorferi* wild type and two isogenic *bb0405*-mutant clones (Mut1 and Mut2) and used in PCR analysis for detection of endogenous plasmids. Note that a nonessential linear plasmid, lp5, is nearly undetectable in one of the mutant clones (Mut2); otherwise, mutant plasmid profiles are similar to that of wild-type spirochetes (not shown). One-kilobase DNA ladder is shown on the left.

**Figure S3. BB0405 immunization does not interfere with *B. burgdorferi* infectivity by needle inoculation.** Comparable levels of *B. burgdorferi* in recombinant BB0405-immunized or control mice. Groups of mice (6 animals/group) were immunized with either rBB0405 or PBS (control) mixed with adjuvant and injected with *B. burgdorferi* ( $10^5$  spirochetes/mouse) 10 days after final immunization. Spirochete levels were assessed by measuring copies of *B. burgdorferi flaB* at 10 and 20 days following infection. Amounts of murine  $\beta$ -actin were determined in each sample and used to normalize the quantities of spirochete RNA. Bars represent the mean measurements  $\pm$  SEM from two quantitative PCR analyses from one infection experiment. Levels of *B. burgdorferi* were similar in BB0405-immunized (gray bars) and control mice (black bars). The burdens found in BB0405-immunized mice were not statistically significant different from the control burdens in any tissue or at any time point ( $p > 0.05$ ,  $n = 2$ ).

Figure S1

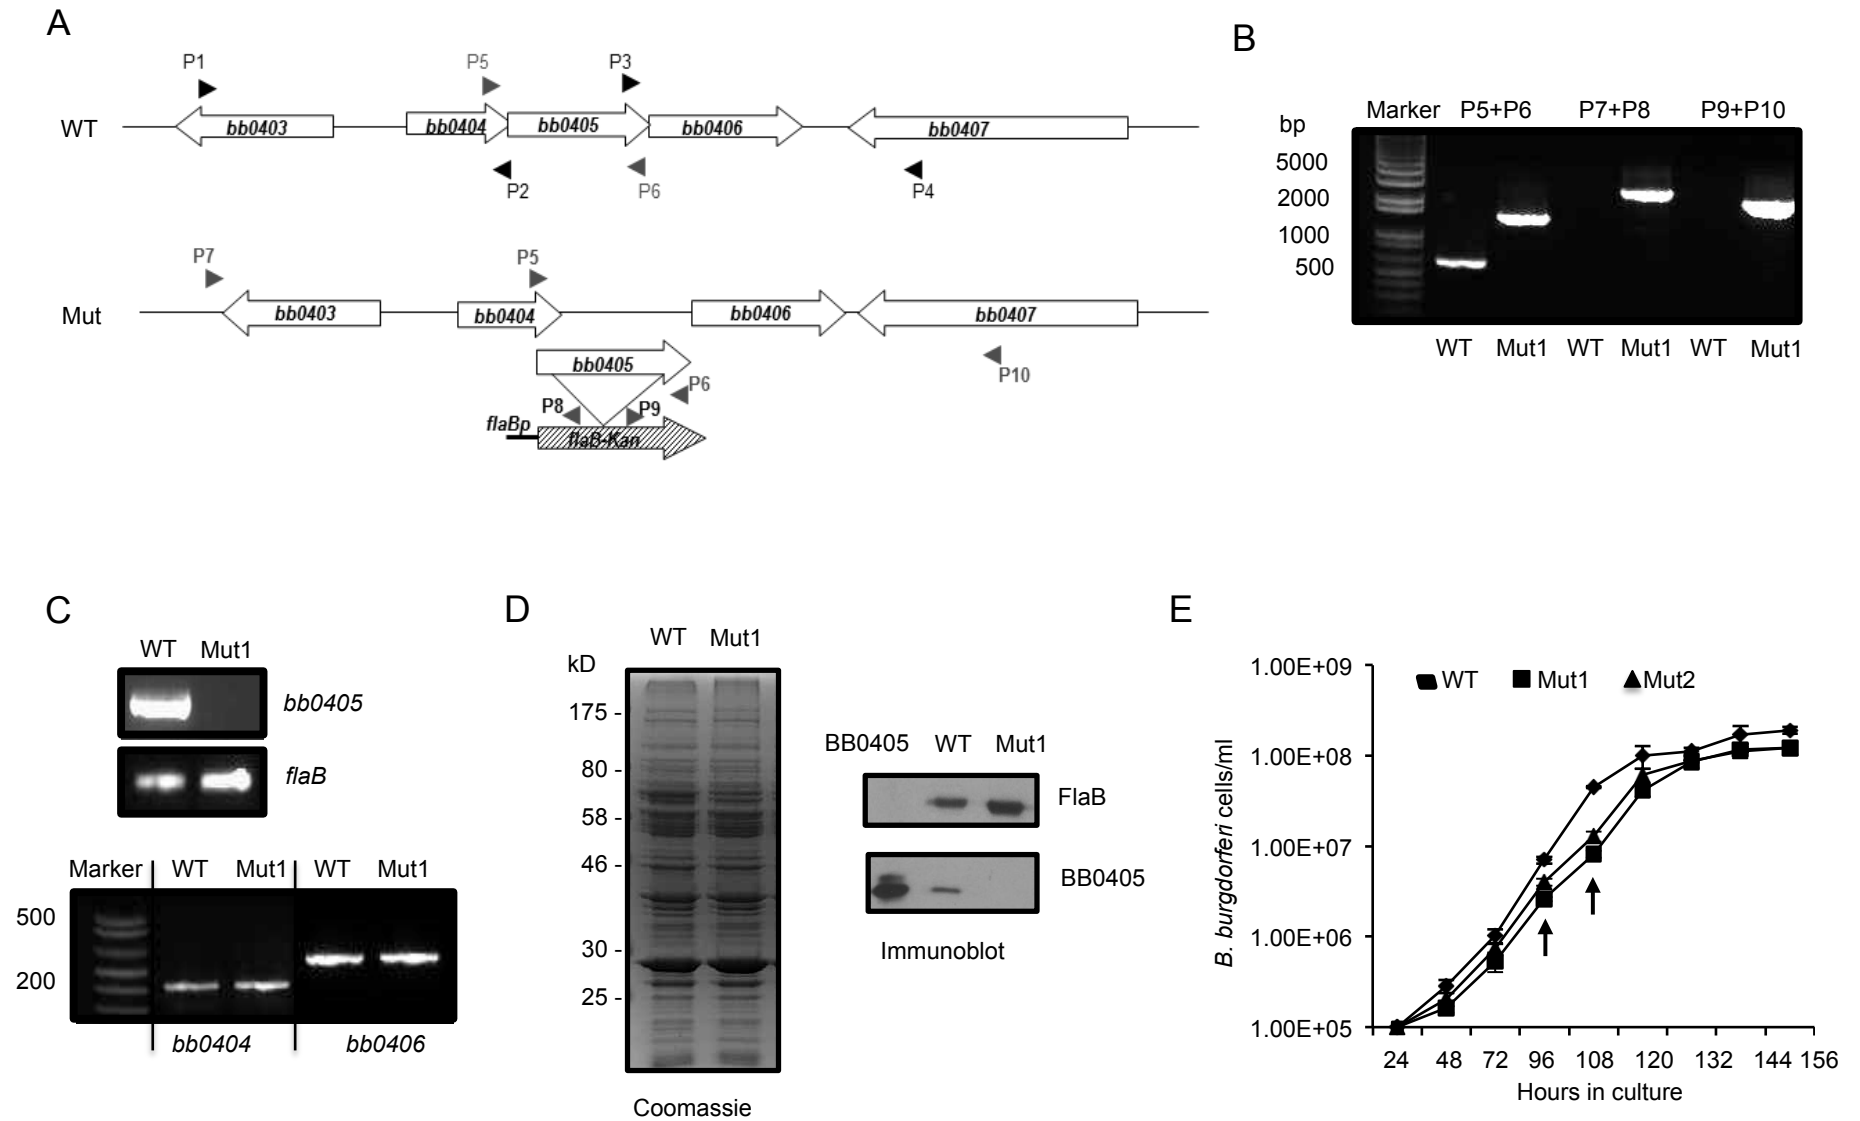

Figure S2

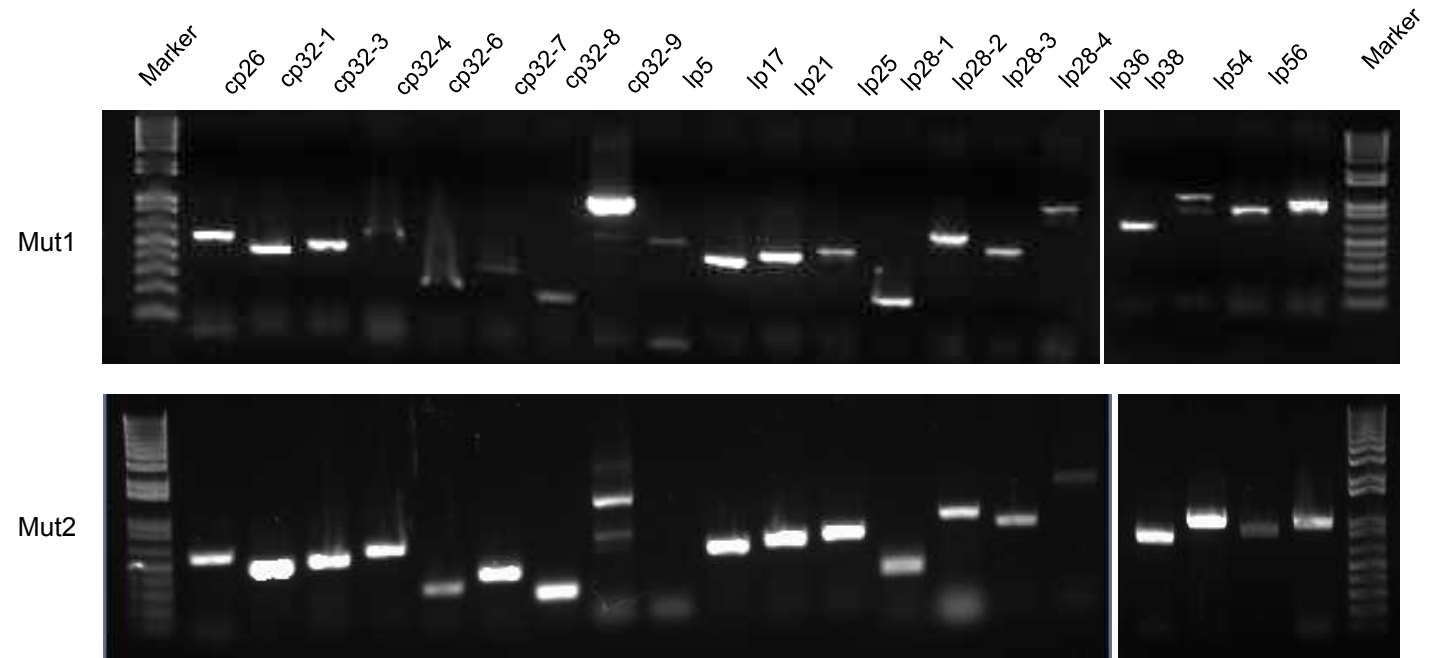

Figure S3

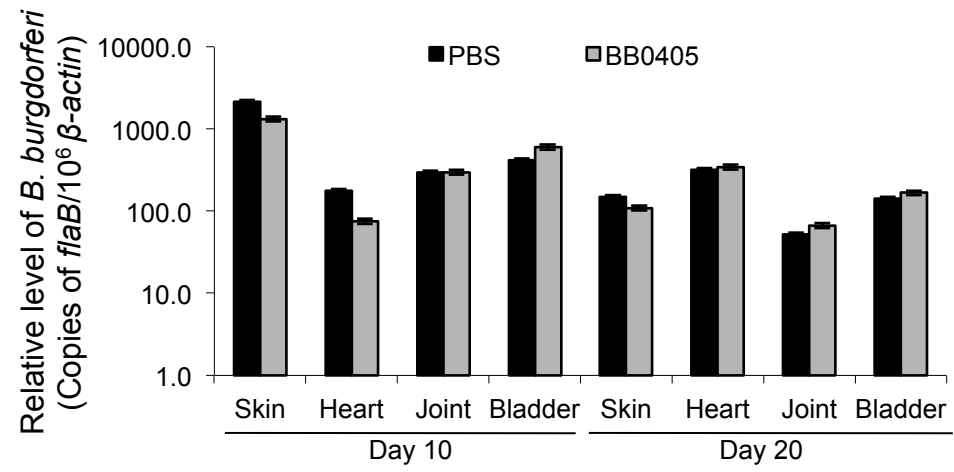

**Table S1**

| <b>Primer</b> | <b>Sequence (5'-3')</b>                         | <b>Purpose</b>                                                                                                                        |
|---------------|-------------------------------------------------|---------------------------------------------------------------------------------------------------------------------------------------|
| BB0404F       | TCTTCCCAAAAATCCTTTACAAA                         | RT-PCR forward primer for BB0404-BB0405                                                                                               |
| BB0405R       | ATCCTCCGTACCCAAGGTCT                            | RT-PCR reverse primer for BB0404-BB0405                                                                                               |
| BB0405F       | ATAGGGGTTGTGATAAGATTGC                          | RT-PCR forward primer for BB0405-BB0406                                                                                               |
| BB0406R       | CTTTAAGCTTTGCGATACAGG                           | RT-PCR reverse primer for BB0405-BB0406                                                                                               |
| FlaBF         | GCTCAAATAAGAGGTTTGTGTC                          | RT-PCR forward primer for <i>flaB</i>                                                                                                 |
| FlaBR         | ATTCCAAGCTCTTCAGCTG                             | RT-PCR reverse primer for <i>flaB</i>                                                                                                 |
| FlaBF1        | TTGCTGATCAAGCTCAATATAACCA                       | qRT-PCR forward primer for <i>flaB</i>                                                                                                |
| FlaBR1        | TTGAGACCCTGAAAGTGATGC                           | qRT-PCR reverse primer for <i>flaB</i>                                                                                                |
| AcmF          | AGAGGGAAATCGTGCGTGAC                            | qRT-PCR forward primer for mouse <i>β-actin</i>                                                                                       |
| AcmR          | CAATAGTGATGACCTGGCCGT                           | qRT-PCR reverse primer for mouse <i>β-actin</i>                                                                                       |
| ActF          | GGTATCGTGCTCGACTC                               | qRT-PCR forward primer for tick <i>β-actin</i>                                                                                        |
| ActR          | ATCAGGTAGTCGGTCAGG                              | qRT-PCR reverse primer for tick <i>β-actin</i>                                                                                        |
| BB0405QF      | GAGTCTGTGCGCCGTTTATT                            | qRT-PCR forward primer for <i>bb0405</i>                                                                                              |
| BB0405QR      | TTTAAGCCCTACGAATCCTC                            | qRT-PCR reverse primer for <i>bb0405</i>                                                                                              |
| P1            | CG <b><i>GGATC</i></b> CTGTAATCAATAACATTCTTTCTA | Forward primer of the left arm for constructing <i>bb0405</i> mutant. A <i>Bam</i> HI site (bold italicized) is attached for cloning. |

|           |                                                     |                                                                                                                                              |
|-----------|-----------------------------------------------------|----------------------------------------------------------------------------------------------------------------------------------------------|
| P2        | AAAA <b><i>CTGCAG</i></b> CGTTGTTAATATAAGTATTATTGTT | Reverse primer of the left arm for constructing <i>bb0405</i> mutant. A <i>Pst</i> I site (bold italicized) is attached for cloning.         |
| P3        | CC <b><i>ATCGAT</i></b> GAAGGAGCTAGATTTAATTTC       | Forward primer of the right arm for constructing <i>bb0405</i> mutant. A <i>Cla</i> I site (bold italicized) is attached for cloning.        |
| P4        | CC <b><i>GCTCAGG</i></b> GAGATTGCATTGAGCTTATGA      | Reverse primer of the right arm for constructing <i>bb0405</i> mutant. A <i>Xho</i> I site (bold italicized) is attached for cloning.        |
| P5        | ATGAGAATGCTATTAGCAACAAT                             | <i>bb0405</i> forward primer                                                                                                                 |
| P6        | TATTTTATAAAGCCTGTGCCTA                              | <i>bb0405</i> reverse primer                                                                                                                 |
| P7        | CCGTTTATACCTATTTCATAAG                              | Upstream forward primer for detection of intended insertion of <i>pflaB-Kan</i> cassette into the <i>bb0405</i> locus.                       |
| P8        | CAAATGTATGAACTTGAGAAGAT                             | Downstream reverse primer for detection of intended insertion of <i>pflaB-Kan</i> cassette into the <i>bb0405</i> locus.                     |
| P9        | GGTTGCATTTCGATTCTGTT                                | Kanamycin internal forward primer                                                                                                            |
| P10       | ATCCGACTCGTCCAACATC                                 | Kanamycin internal reverse primer                                                                                                            |
| BB0405PrF | CG <b><i>GGATCCT</i></b> TAAAAGTCTTAGAATGTACTCCAG   | Forward primer for amplifying the putative <i>bb0405</i> promoter. A <i>Bam</i> HI site (bold italicized) is attached for cloning.           |
| BB0405PrR | <b>TAGCATTCTC</b> ATAAATTTATCCCAAAAATTTAA           | Reverse primer for amplifying the putative <i>bb0405</i> promoter. A 12-nucleotide 5' extension (bold) is complementary to the 5' end of the |

*bb0405* ORF.

---

|            |                                                        |                                                                                                                                                |
|------------|--------------------------------------------------------|------------------------------------------------------------------------------------------------------------------------------------------------|
| BB0405FCOM | <b>TGGGATAAATTTATGAGAATGCTATTAGCAACAAT</b>             | Forward primer for <i>bb0405</i> complementation. A 12-nucleotide 5' extension (bold) is complementary to the 5' end of the promoter fragment. |
| BB0405RCOM | ACGC <b><i>GTGCAC</i></b> CTATATATATATATTTTTATAAAGCCTG | Reverse primer used for amplifying the <i>bb0405</i> ORF. A <i>SalI</i> site (bold italicized) is attached for cloning.                        |
| BB0405F1   | CGC <b><i>GATCC</i></b> GCACAATCCAAAAGCAAAGTATG        | Forward primer for recombinant BB0405 production in <i>E. coli</i> . A <i>BamHI</i> site (bold italicized) is attached for cloning.            |
| BB0405R1   | CCG <b><i>GAATTC</i></b> CTATATATATATATTTTTATAAAGCCTG  | Reverse primer for recombinant BB0405 production in <i>E. coli</i> . An <i>EcoRI</i> site (bold italicized) is attached for cloning.           |

---
